# Supplementary material for: PCR Assay for Rapid Taxonomic Differentiation of Virulent Staphylococcus aureus and Klebsiella pneumoniae Bacteriophages
Source: MDPI journal article supplement (doi:10.3390/ijms24054483), 2023-02-24
Supplement: s1 [file s1]

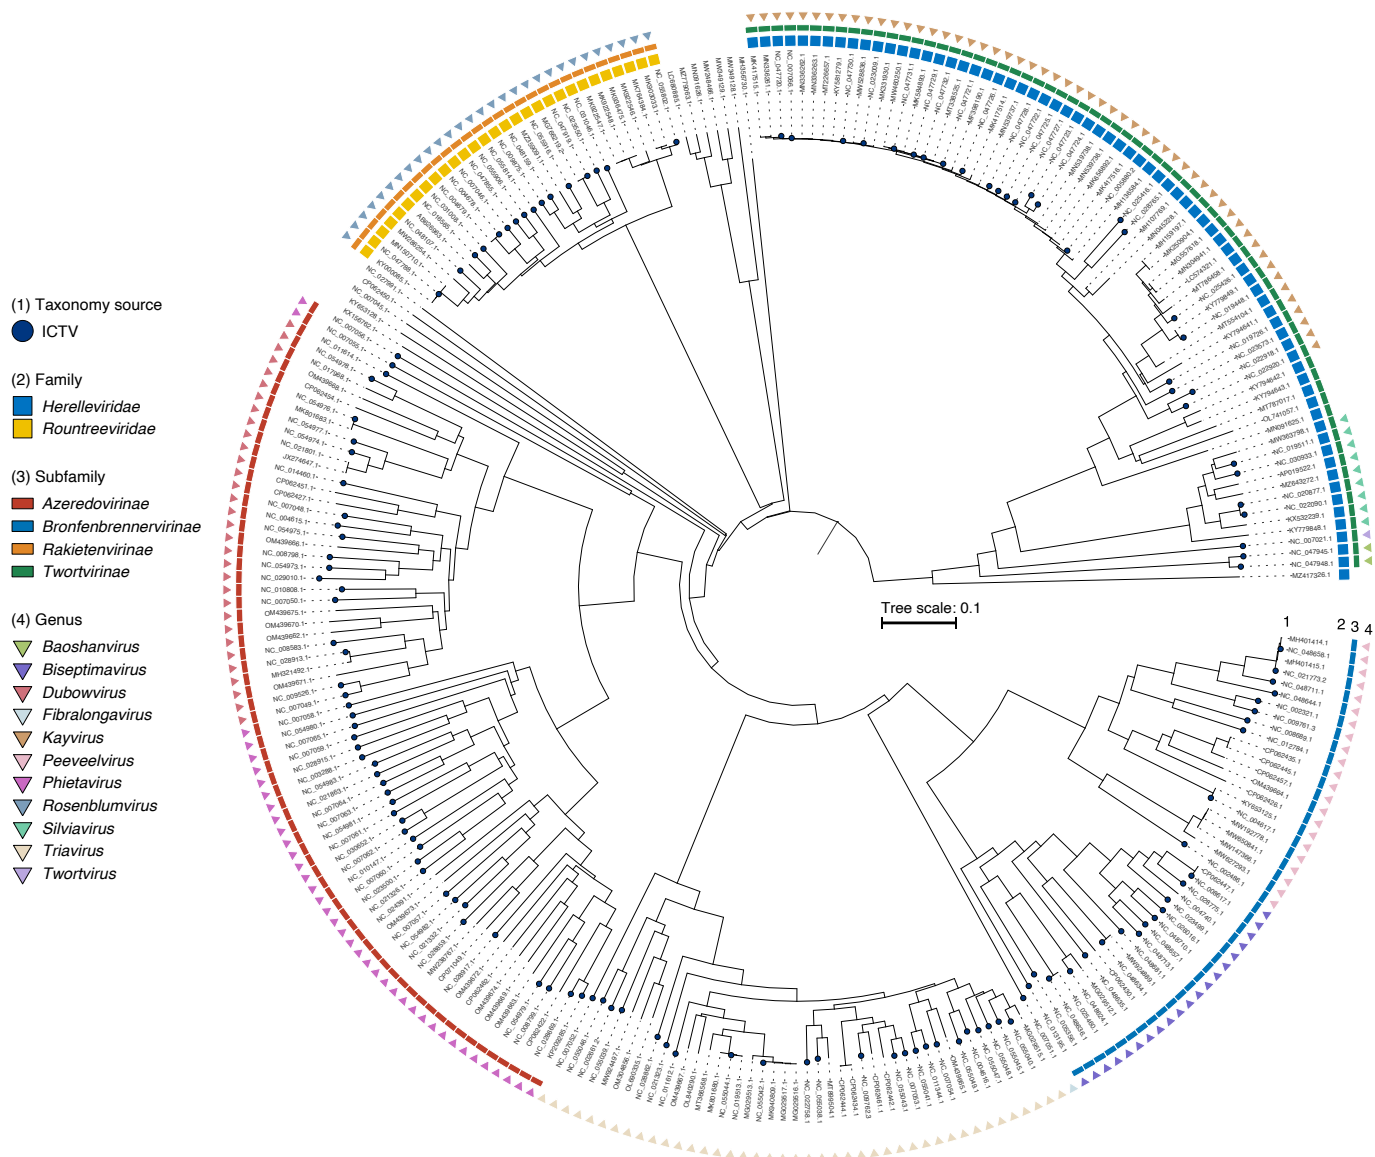

## Supplementary Figure S1

Midpoint-rooted phylogenetic tree of  $n = 269$  *S. aureus* phages based on protein distances between genomes.

The three external rings indicate the family, subfamily and genus rank, respectively. Genomes with available ICTV taxonomy are shown as dots on tip ends.

(1) Taxonomy source

● ICTV

(2) Family

Ackermannviridae  
 Autographiviridae  
 Casjensviridae  
 Demereciviridae  
 Drexelviridae  
 Peduoviridae  
 Schitoviridae  
 Straboviridae

(3) Subfamily

Enquatrovirinae  
 Humphriesvirinae  
 Slopekvirinae  
 Stephanstirmvirinae  
 Studiervirinae  
 Tevenvirinae  
 Vequintavirinae

(4) Genus

Alcyoneusvirus  
 Dagavirus  
 Drulisvirus  
 Elveevirus  
 Felsduovirus  
 Gegavirus  
 Gegevirus  
 Jedunavirus  
 Jiaodavirus  
 Kapieceevirus  
 Kaypocavirus  
 Lastavirus  
 Marfavirus  
 Mydovirus  
 Phapecocravirus  
 Przondovirus  
 Pylasvirus  
 Reginaelenavirus  
 Reipivirus  
 Slopekvirus  
 Sortsnevirus  
 Sugarlandvirus  
 Taipeivirus  
 Vimunumvirus  
 Webervirus  
 Yonseivirus  
 Yulgyerivirus

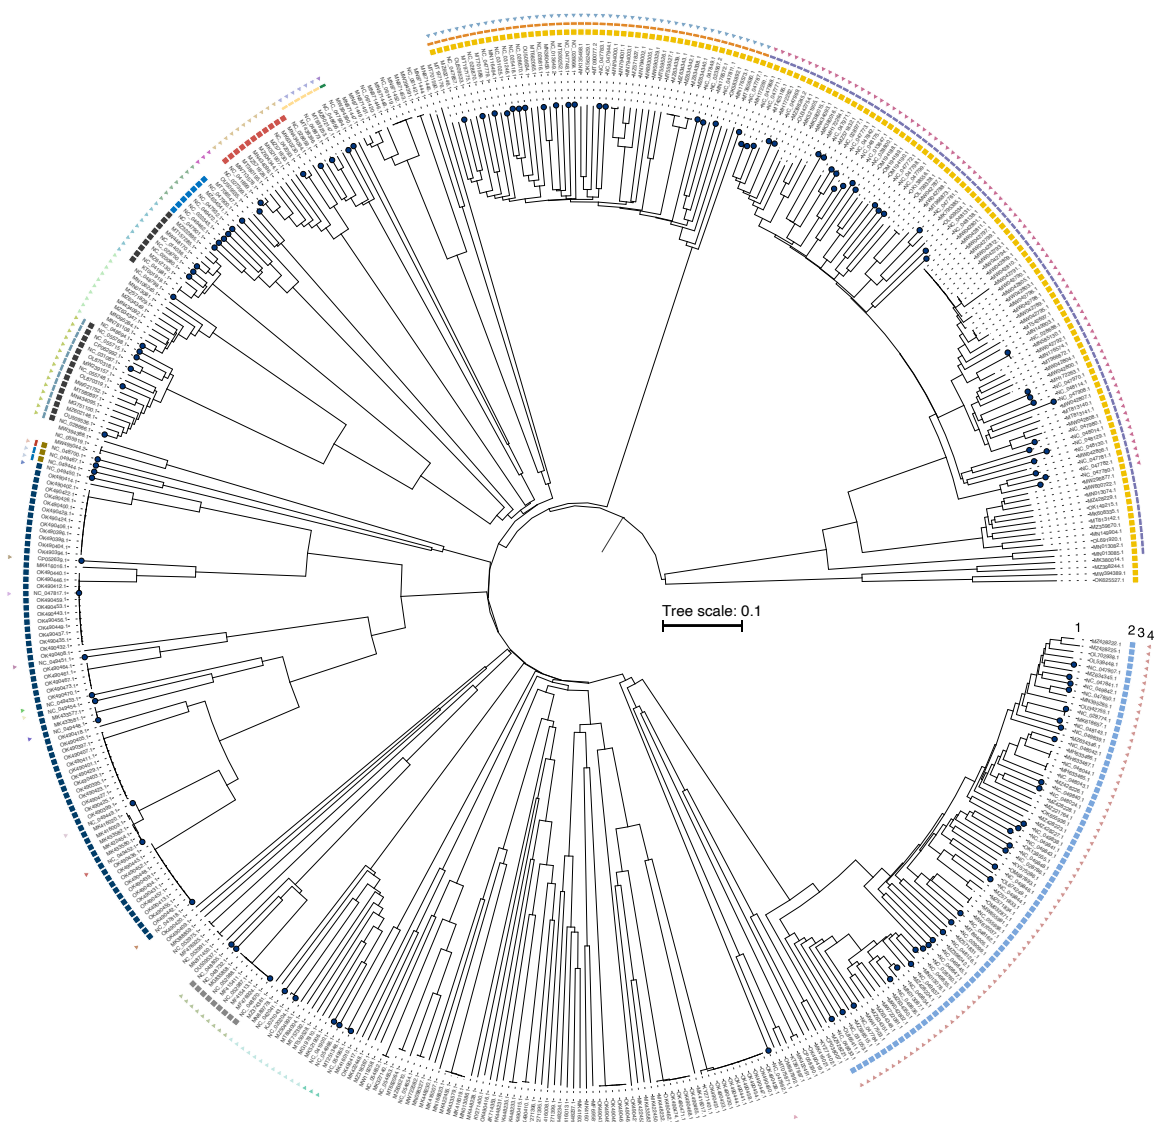

## Supplementary Figure S2

Midpoint-rooted phylogenetic tree of  $n = 480$  *K. pneumoniae* phages based on protein distances between genomes.

The three external rings indicate the family, subfamily and genus rank, respectively. Genomes with available ICTV taxonomy are shown as dots on tip ends.

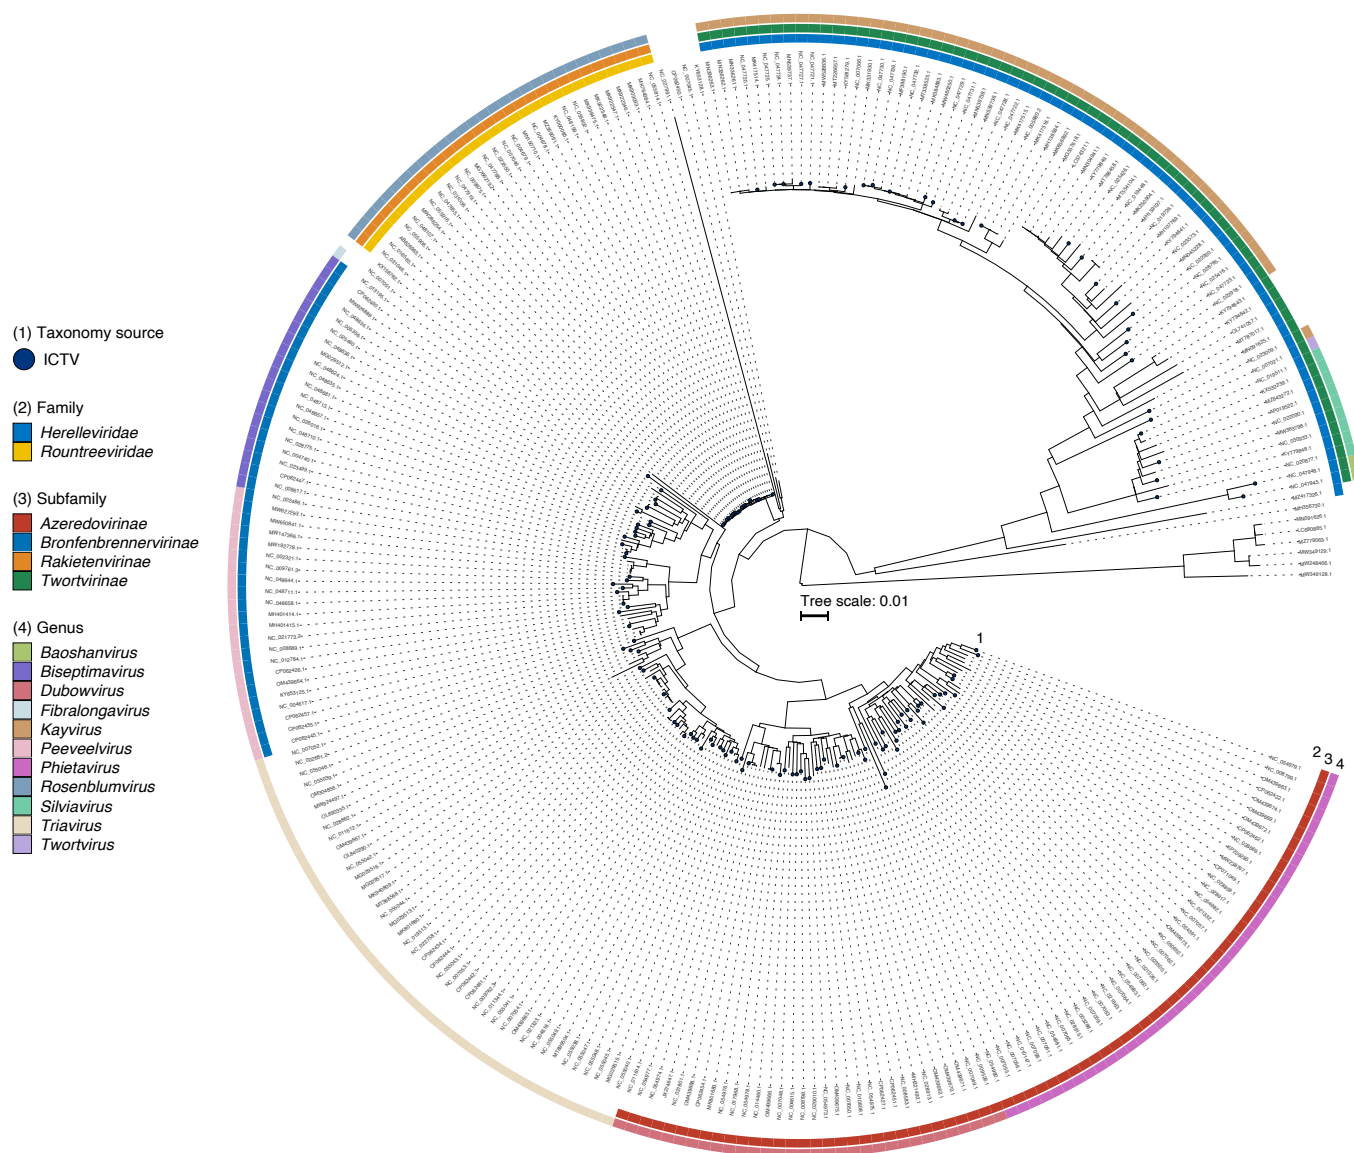

### Supplementary Figure S3

Midpoint-rooted phylogenetic tree of  $n = 269$  *S. aureus* phages based on pairwise distance matrix from gene presence/absence data.

The three external rings indicate the family, subfamily and genus rank, respectively. Genomes with available ICTV taxonomy are shown as dots on tip ends.

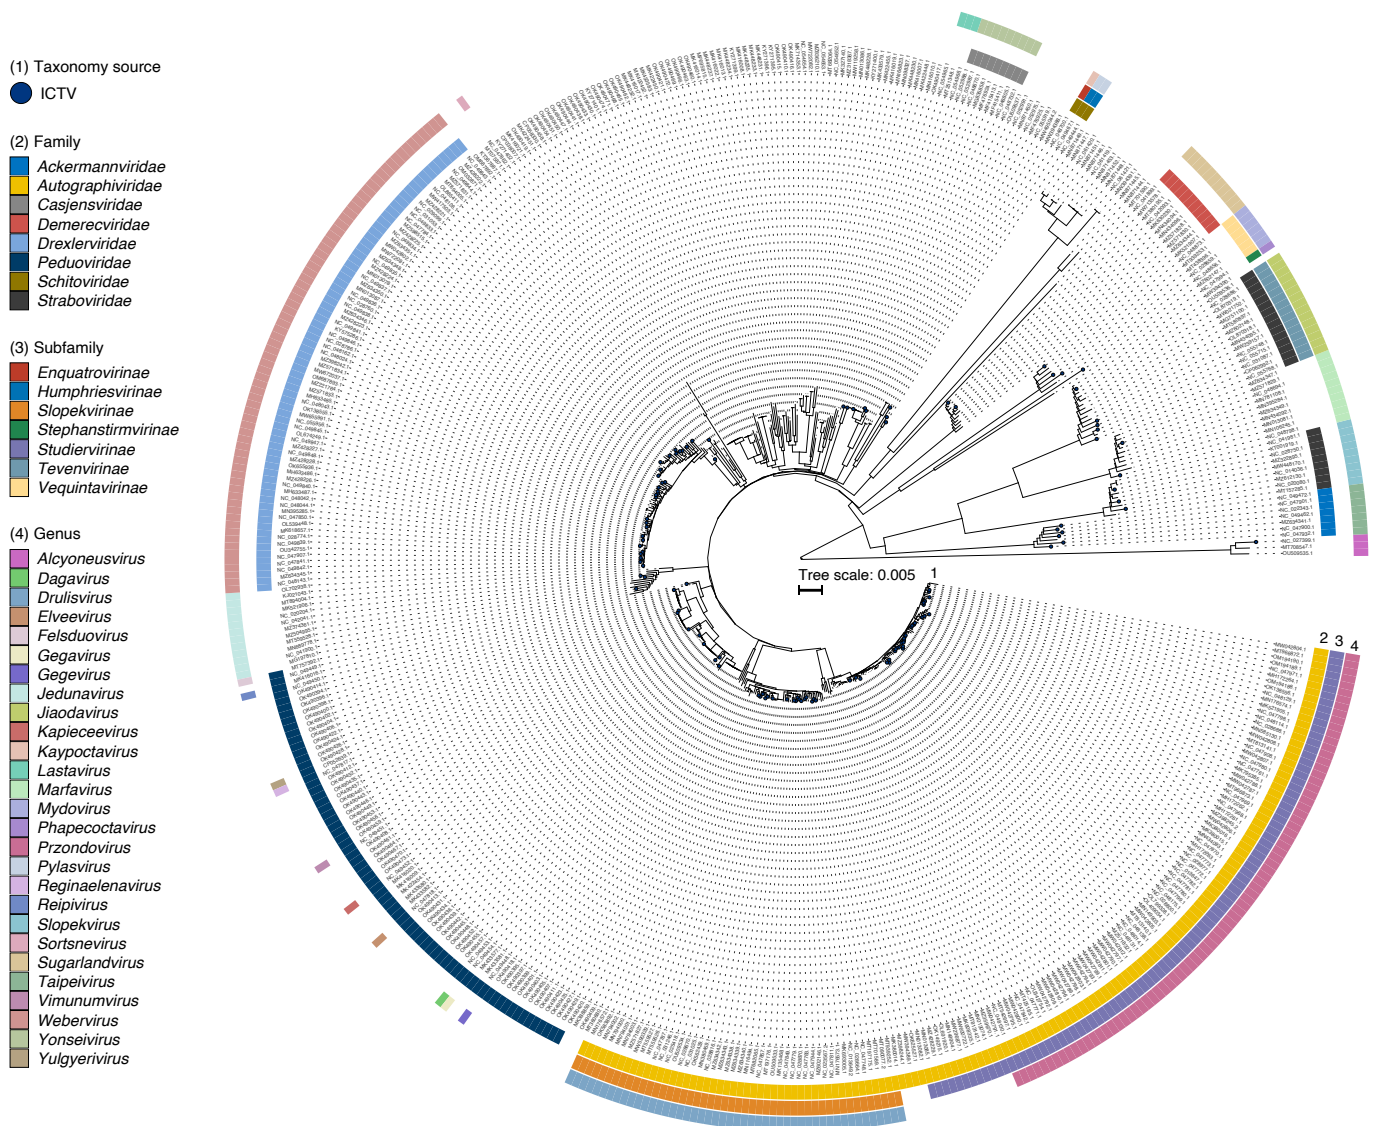

## Supplementary Figure S4

Midpoint-rooted phylogenetic tree of  $n = 480$  *K. pneumoniae* phages based on pairwise distance matrix from gene presence/absence data.

The three external rings indicate the family, subfamily and genus rank, respectively. Genomes with available ICTV taxonomy are shown as dots on tip ends.
